# Supplementary material
Source: PubMed Central journal article supplement (PMC2836794)
Supplement: NIHMS174445-supplement-Supp4Table.pdf [file NIHMS174445-supplement-Supp4Table.pdf]

|                   | RMP (mV)       | Input Resistance (mOhm) | AP threshold (mV) | AP amplitude (mV) | AP duration (ms) | Presence of DAP | Response to 100 $\mu$ M 5-HT (mV) |
|-------------------|----------------|-------------------------|-------------------|-------------------|------------------|-----------------|-----------------------------------|
| Type 1 CeA neuron | 69.8 $\pm$ 2.6 | 260 $\pm$ 38.7          | 30.6 $\pm$ 2.5    | 98.4 $\pm$ 2.3    | 1.7 $\pm$ 0.3    | YES             | - 6.4 $\pm$ 1.5                   |
| Type 2 CeA neuron | 71.5 $\pm$ 1.9 | 131 $\pm$ 1.5 *         | 20.2 $\pm$ 1.8 *  | 84.1 $\pm$ 2.5 *  | 1.5 $\pm$ 0.1    | NO              | 0.8 $\pm$ 2.2 **                  |

**Table S1. Electrophysiological characteristics of type-I and type-II neurons from central nucleus of the amygdala.** Mean and standard error of the mean for the resting membrane potential (RMP), input resistance, and action potential (AP) threshold, amplitude, and duration were recorded for type-I (N=9) and type-II (N=11) CeA neurons (\* P < 0.02, \*\* P < 0.002).
