# Supplementary material
Source: PubMed Central journal article supplement (PMC2836794)

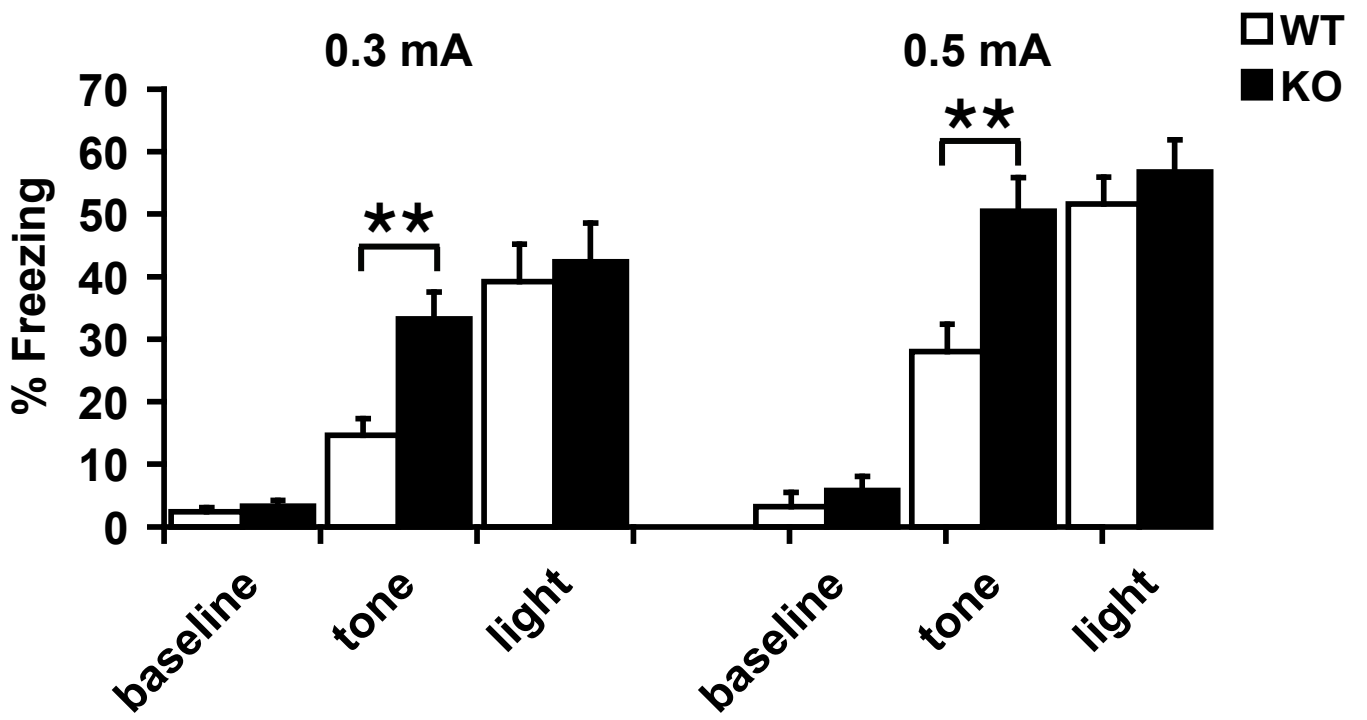

Supplement: NIHMS174445-supplement-Supp1.pdf [file NIHMS174445-supplement-Supp1.pdf]

Tsetsenis et al., Suppl. Figure 2

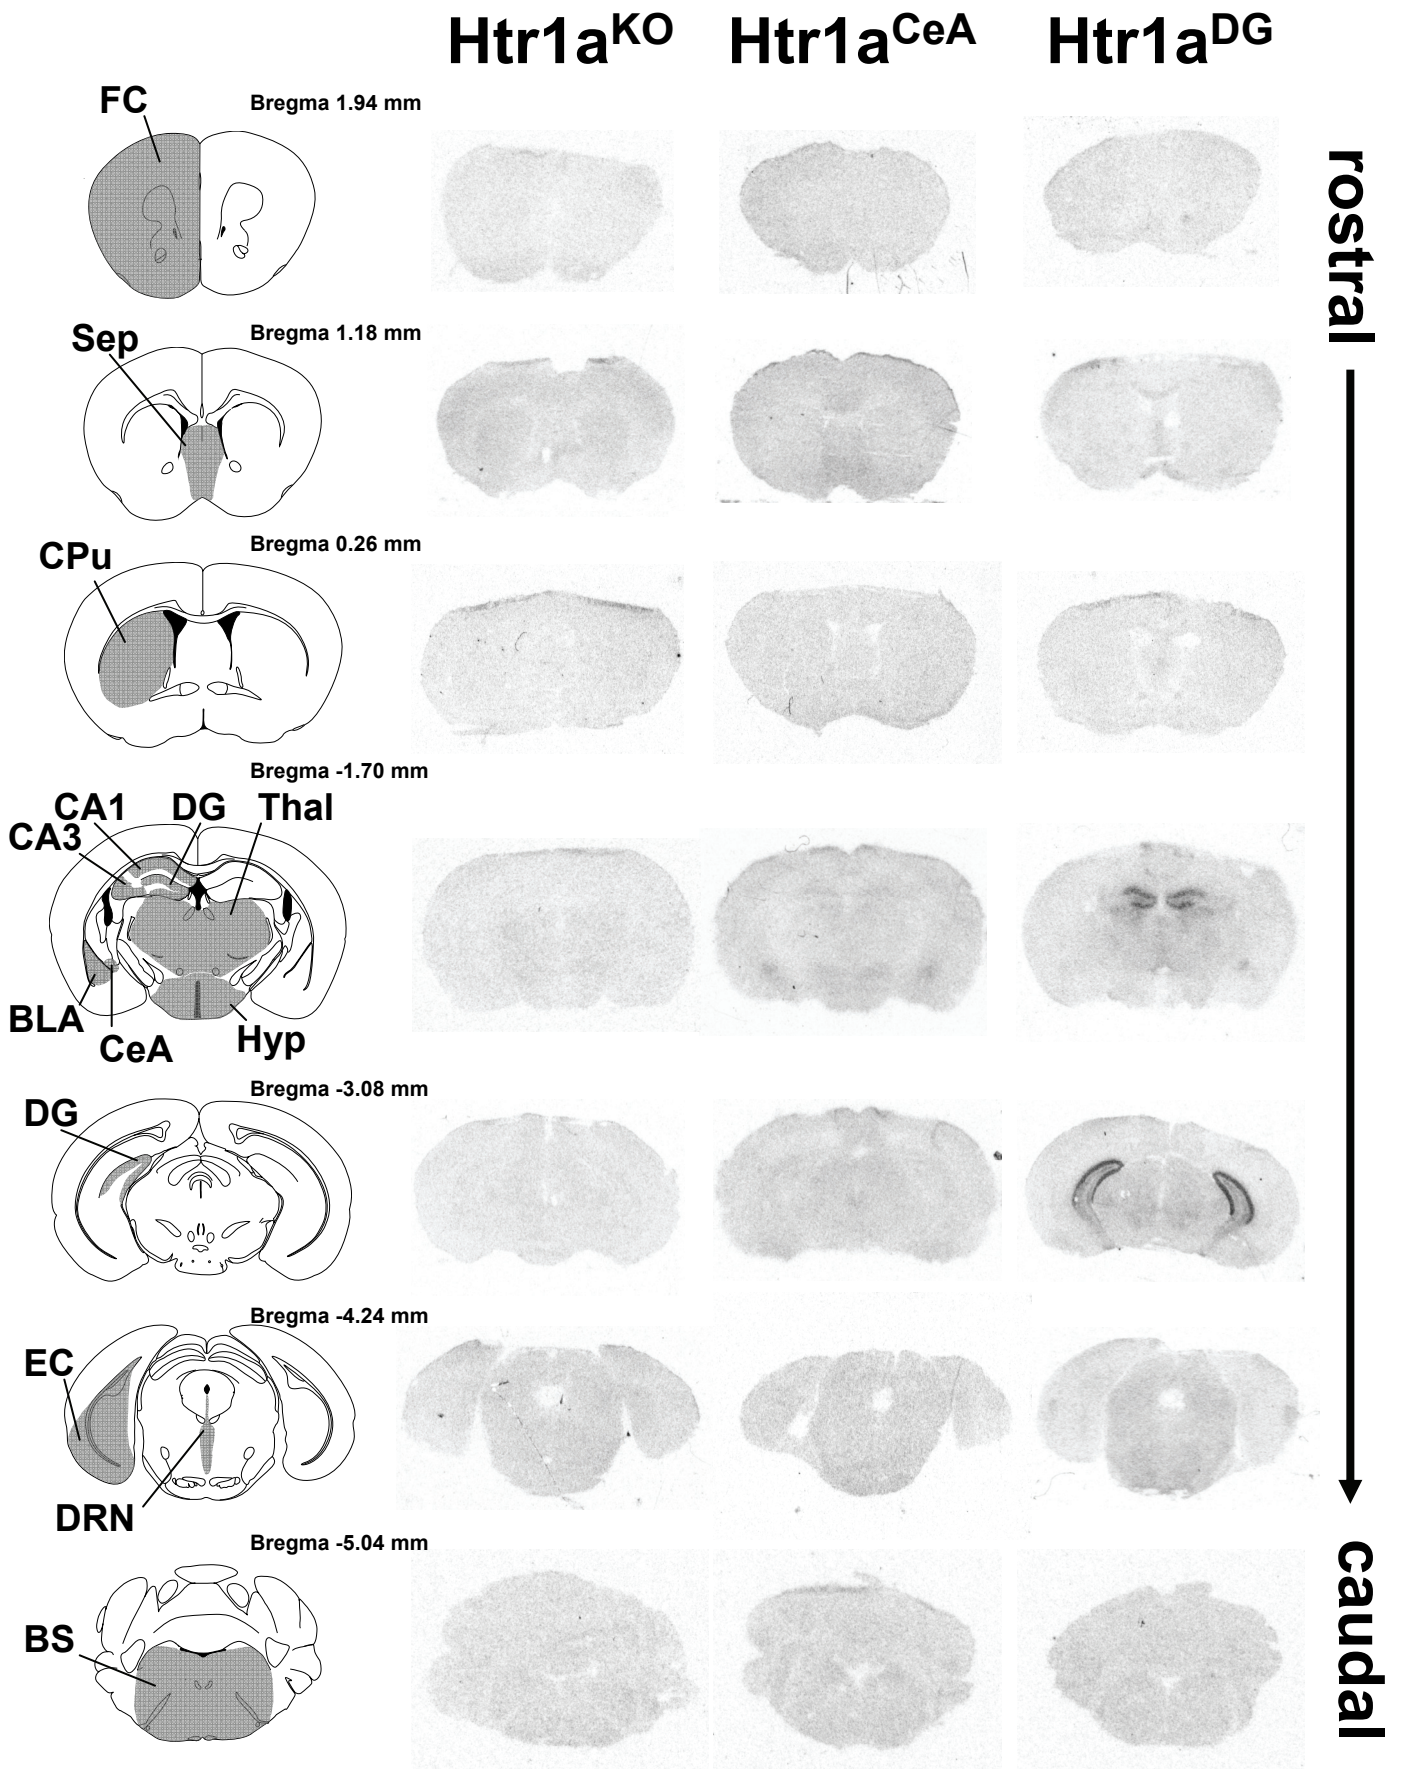

Supplement: NIHMS174445-supplement-Supp2.pdf [file NIHMS174445-supplement-Supp2.pdf]

Tsetsenis et al., Suppl. Figure 3

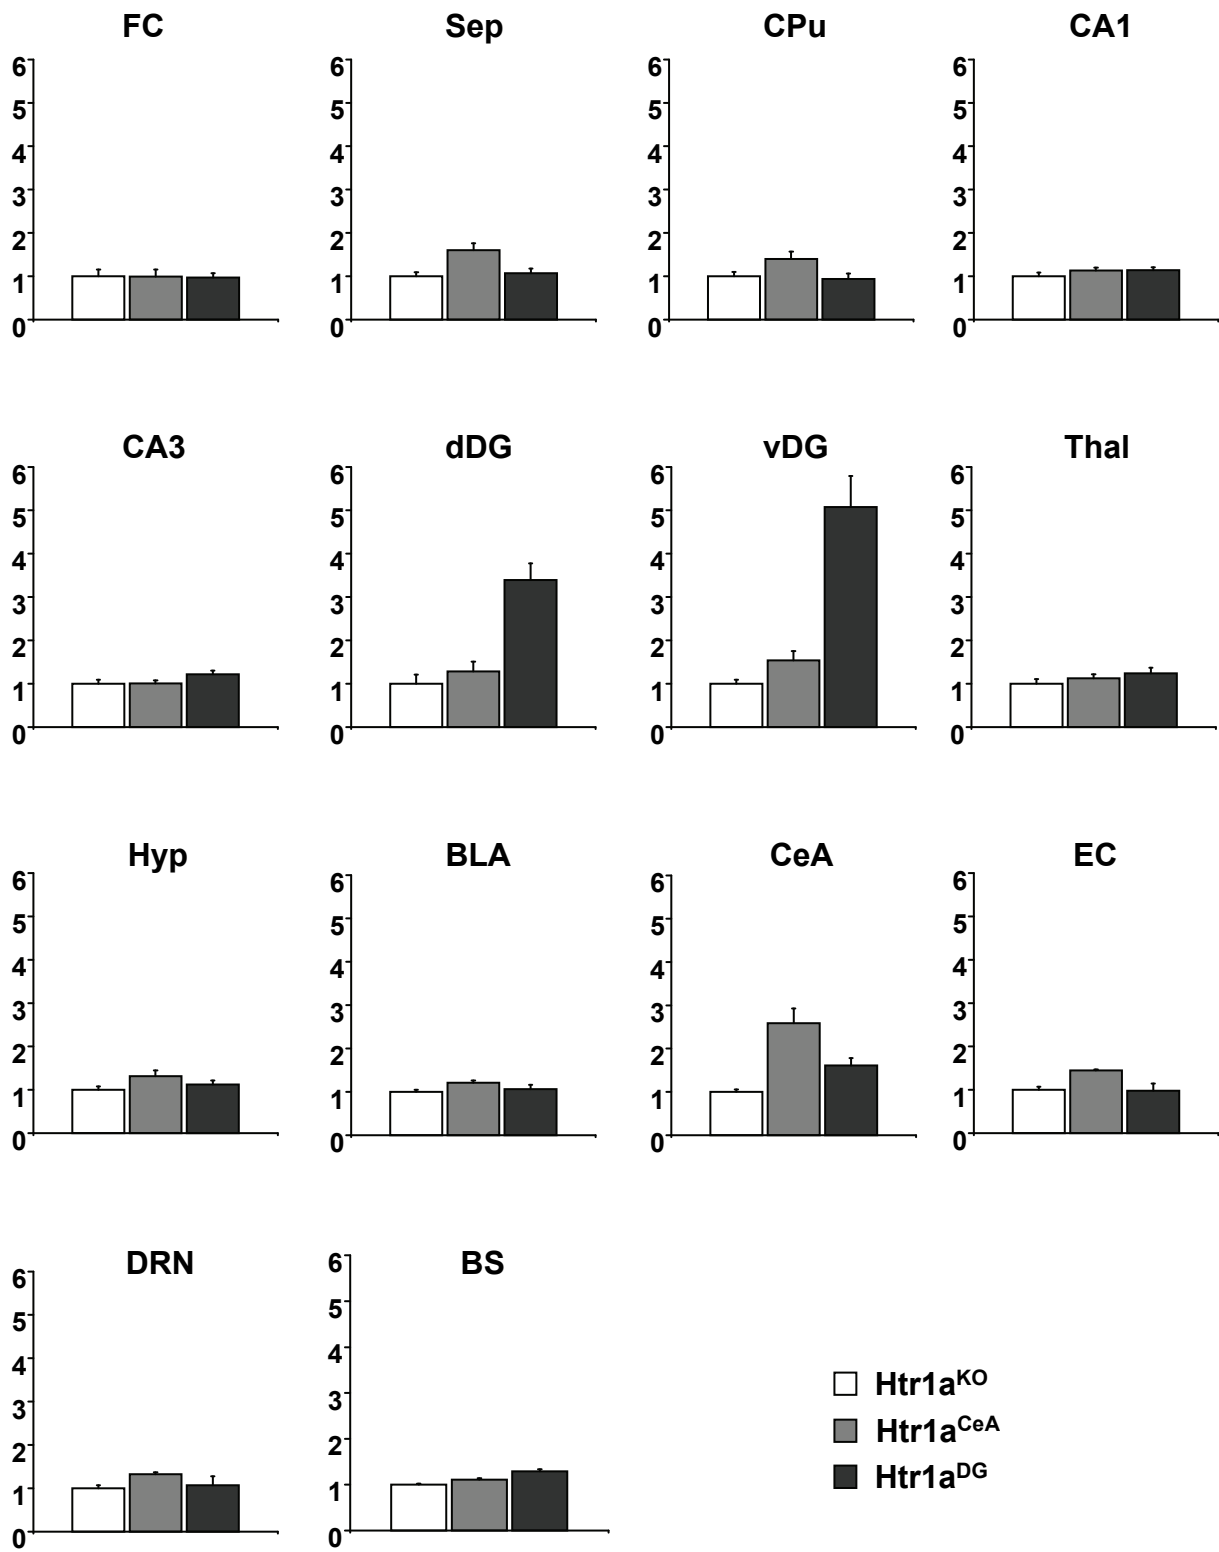

Supplement: NIHMS174445-supplement-Supp3.pdf [file NIHMS174445-supplement-Supp3.pdf]
